# Supplementary material for: Prevalence and risk factors of stroke in China: a national serial cross-sectional study from 2003 to 2018
Source: PubMed Central journal article supplement — Stroke Vasc Neurol. 2022 Nov 23;8(3):238–48. doi: 10.1136/svn-2022-001598 (PMC10359805; doi:10.1136/svn-2022-001598), 2022-11-23
Supplement: svn-2022-001598supp001.pdf [file svn-2022-001598supp001.pdf]

### Appendix 1. Flow Diagram of the Study Population

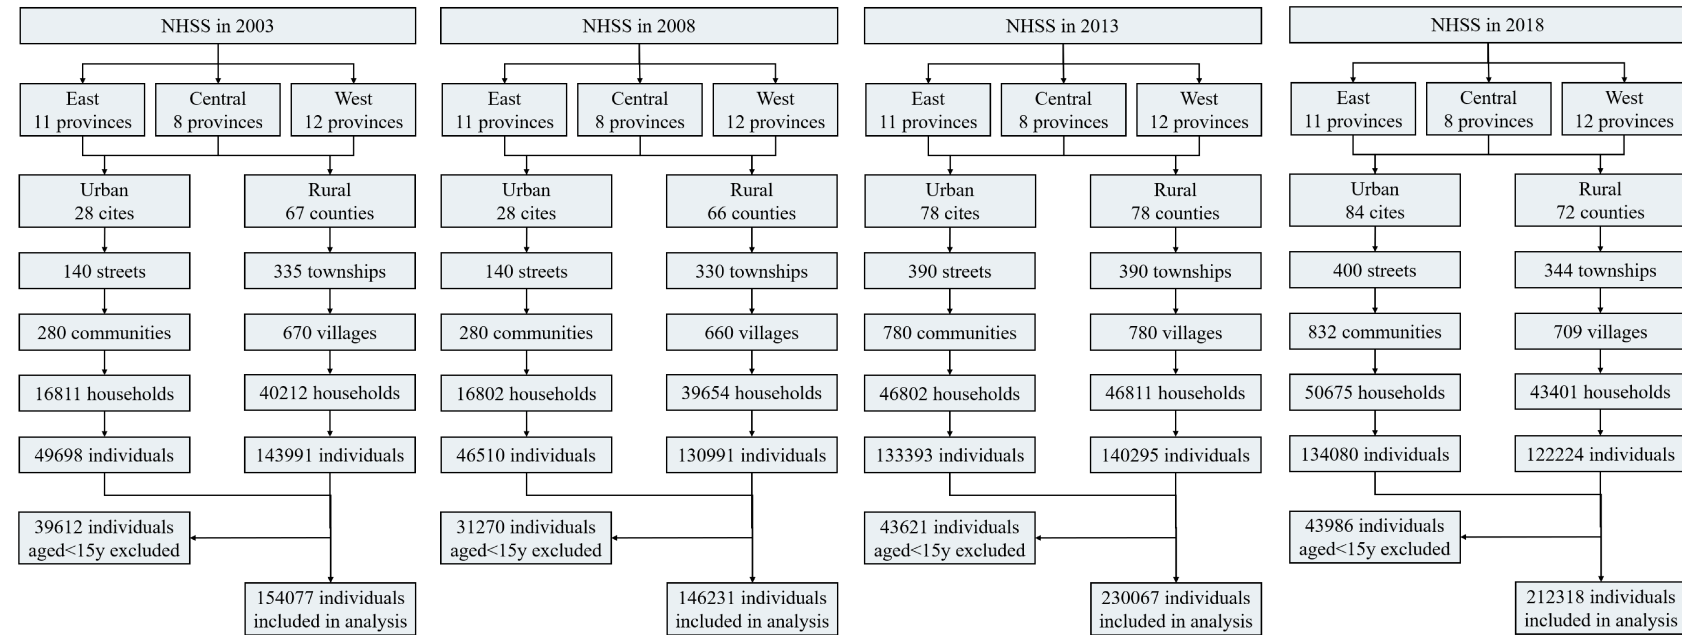

Abbreviation: NHSS, National Health Service Survey.

**Appendix 2. The Information Extracted in Our Survey from The Whole Questionnaire of NHSS****Family information**

| No. | Question                                                                                                                                                                                                                                                                                                                                                                                                                                                                 | Answer |
|-----|--------------------------------------------------------------------------------------------------------------------------------------------------------------------------------------------------------------------------------------------------------------------------------------------------------------------------------------------------------------------------------------------------------------------------------------------------------------------------|--------|
| 1   | How many people have lived in your home in the past 6 months? (Including relatives and friends, nannies, etc. who have lived for over 6 months)                                                                                                                                                                                                                                                                                                                          |        |
| 2   | Which type of fuel used in your home: (1) Electricity; (2) Gas/natural gas/liquefied petroleum gas; (3) Marsh gas; (4) Kerosene; (5) Coal; (6) Firewood; (7) Others                                                                                                                                                                                                                                                                                                      |        |
| 3   | Which type of sanitation facilities used in your home: (1) Integrated flushing toilet; (2) Urine-faces division toilet; (3) Three link biogas toilet; (4) Dual-urn funnel toilet; (5) Three-septic-tank toilet; (6) Alternating dual-pit toilet; (7) Ventilated improved pit latrine; (8) Attic type latrine; (9) Deep pit latrine : (10) Pit latrines with slab; (11) Pit latrines without a slab or platform; (12) Bucket latrines; (13) Open defecation; (14) Others. |        |
| 4   | What was the total annual income of your family in the previous year? (yuan)                                                                                                                                                                                                                                                                                                                                                                                             |        |

**Household member information**

| <b>Demographic information of each household member</b>                                                |                                                                                                                                                                                                           |    |    |    |    |    |     |
|--------------------------------------------------------------------------------------------------------|-----------------------------------------------------------------------------------------------------------------------------------------------------------------------------------------------------------|----|----|----|----|----|-----|
| Household members coding (01, the householder; Other members, according to the order of investigation) |                                                                                                                                                                                                           | 01 | 02 | 03 | 04 | 05 | ... |
| 1                                                                                                      | Name of household member: (01, name of the householder)                                                                                                                                                   |    |    |    |    |    |     |
| 2                                                                                                      | Relationship with the householder: (1) Householder; (2) Spouse; (3) Child; (4) Grandchild; (5) Parent; (6) Grandparent; (7) Brother or sister; (8) Others                                                 |    |    |    |    |    |     |
| 3                                                                                                      | Gender: (1) Male; (2) Female                                                                                                                                                                              |    |    |    |    |    |     |
| 4                                                                                                      | Date of birth: (Year/Month)                                                                                                                                                                               | /  | /  | /  | /  | /  | /   |
| 5                                                                                                      | Marital status: (1) Single; (2) Married; (3) Divorced; (4) Widowed; (5) Others                                                                                                                            |    |    |    |    |    |     |
| 6                                                                                                      | Level of education:<br>(1) None; (2) Primary school; (3) Junior middle school; (4) Senior high school/technical school;<br>(5) Secondary specialized school; (6) Junior college; (7) University and above |    |    |    |    |    |     |
| 7                                                                                                      | Employment status: (1) Employed; (2) Retired; (3) Student; (4) Unemployed                                                                                                                                 |    |    |    |    |    |     |
| <b>Chronic diseases information of each household member</b>                                           |                                                                                                                                                                                                           |    |    |    |    |    |     |
| 1                                                                                                      | Have you suffered from any chronic diseases diagnosed by doctors? (1) Yes; (2) No                                                                                                                         |    |    |    |    |    |     |

|                                                  |                                                                                                                                                            |  |  |  |  |  |  |
|--------------------------------------------------|------------------------------------------------------------------------------------------------------------------------------------------------------------|--|--|--|--|--|--|
|                                                  | (if more than one disease, please fill in the name of disease according to the severity of disease from severe to mild)                                    |  |  |  |  |  |  |
| 2                                                | (1) Name of the first disease:                                                                                                                             |  |  |  |  |  |  |
| 3                                                | The code of the first disease:                                                                                                                             |  |  |  |  |  |  |
| 4                                                | When were you diagnosed with it? (1) Over 6 months ago; (2) Within the past 6 months                                                                       |  |  |  |  |  |  |
| 5                                                | Have you been treated within the past 6 months? (1) Yes; (2) No                                                                                            |  |  |  |  |  |  |
| 6                                                | (2) Name of the second disease:                                                                                                                            |  |  |  |  |  |  |
| 7                                                | The code of the second disease:                                                                                                                            |  |  |  |  |  |  |
| 8                                                | When were you diagnosed with it? (1) Over 6 months ago; (2) Within the past 6 months                                                                       |  |  |  |  |  |  |
| 9                                                | Have you been treated within the past 6 months? (1) Yes; (2) No                                                                                            |  |  |  |  |  |  |
| 10                                               | (3) Name of the third disease:                                                                                                                             |  |  |  |  |  |  |
| 11                                               | The code of the third disease:                                                                                                                             |  |  |  |  |  |  |
| 12                                               | When were you diagnosed with it? (1) Over 6 months ago; (2) Within the past 6 months                                                                       |  |  |  |  |  |  |
| 13                                               | Have you been treated in the past 6 months? (1) Yes; (2) No                                                                                                |  |  |  |  |  |  |
| <b>Quality of life for each household member</b> |                                                                                                                                                            |  |  |  |  |  |  |
| 1                                                | Depression: (1) I am not depressed; (2) I am moderately depressed; (3) I am extremely depressed                                                            |  |  |  |  |  |  |
| <b>Lifestyle of each household member</b>        |                                                                                                                                                            |  |  |  |  |  |  |
| 1                                                | Do you smoke?<br>(1) Yes (have smoked a total of at least 100 cigarettes); (2) have quit smoking; (3) Never                                                |  |  |  |  |  |  |
| 2                                                | Have you had a drink containing alcohol in the past 12 months? (1) Yes; (2) No                                                                             |  |  |  |  |  |  |
| 3                                                | How many times per week do you drink? (1) 3 or more; (2) 1 to 2; (3) Less than 1                                                                           |  |  |  |  |  |  |
| 4                                                | In the past 6 months, how many times per week do you do physical activity on average?<br>(1) 6 or more; (2) 3 to 5; (3) 1 to 2; (4) Less than 1; (5) Never |  |  |  |  |  |  |

**Notes:** Chronic diseases, including hypertension, diabetes, and stroke, must be diagnosed by doctors and medical records or prescription from medical institution must be provided as evidence for diagnosis

**Appendix 3. Definitions of risk factors for stroke**

| Risk factor           | Definition                                                                                                                                                                                                                                                    |
|-----------------------|---------------------------------------------------------------------------------------------------------------------------------------------------------------------------------------------------------------------------------------------------------------|
| Educational level     | Grouped into five categories: none, primary level, junior high level, senior high level, and college level.                                                                                                                                                   |
| Occupation            | Categorized into employed, retired, student, and unemployed groups                                                                                                                                                                                            |
| Income                | Categorized into high, middle, and low levels. High level presented top fourth of annual per capital income in the sampled county at the survey year, the bottom fourth was low level, and others belonged middle level.                                      |
| Marital status        | Categorized into married, single, divorced, and widowed status                                                                                                                                                                                                |
| Hypertension          | Self-reported for ever being diagnosed with hypertension by medical institution.                                                                                                                                                                              |
| Diabetes              | Self-reported for ever being diagnosed with diabetes by medical institution.                                                                                                                                                                                  |
| Depression            | Self-perceived health according to quality of life questionnaire.                                                                                                                                                                                             |
| Smoking               | Participants have smoked a total of at least 100 cigarettes, and either continued or ceased smoking during the survey                                                                                                                                         |
| Alcohol consumption   | Participants have had an alcoholic drink in the 12 months prior to the survey                                                                                                                                                                                 |
| Physical activity     | Participants have participated in physical activity (including tai chi, jogging, dancing, swimming, ball sports, aerobics, and apparatus exercise) at least once a week in the previous month.                                                                |
| Sanitation facilities | Unimproved sanitation facility is defined as not ensure hygienic separation of human excreta from human contact, and open defecation.<br>Improved sanitation facility is defined as likely to ensure hygienic separation of human excreta from human contact. |

**Appendix 4. The mathematical formula of Multiple logistic regression.**

We constructed multiple unconditional logistic regression models to explore the risk factors of stroke.

The formula of unconditional logistic regression is the following:

$$\log it(p(y = 1|x)) = \alpha + \sum_{j=1}^m \beta_j x_j$$

Where  $y$  is the binary outcome (1 or 0),  $x_1, \dots, x_m$  are independent variables,  $\alpha$  is the intercept,  $\beta_1, \dots, \beta_m$  are coefficients of these independent variables.

The Odds Ratio (OR) along with its 95% confidence interval for each independent variable can be calculated as while other factors are constant:

$$OR_j = \exp(\beta_j)$$
$$95\%CI: \exp(\beta_j \pm 1.96 \times SE\{\beta_j\})$$

The SAS9.4 PROC LOGISTIC procedure was used to fit multiple unconditional logistic regression models and stepwise selection (sle=0.05, sls=0.10) was applied to select the optimal model.

## Appendix 5. Trends in Prevalence of Stroke by Provinces in Different Region in China from 2003 to 2018.

|                       | 2003                |                                     | 2008                |                                     | 2013                |                                     | 2018                |                                     | P value for Trend <sup>b</sup> |
|-----------------------|---------------------|-------------------------------------|---------------------|-------------------------------------|---------------------|-------------------------------------|---------------------|-------------------------------------|--------------------------------|
|                       | No. of Participants | Rates/100,000 (95% CI) <sup>a</sup> | No. of Participants | Rates/100,000 (95% CI) <sup>a</sup> | No. of Participants | Rates/100,000 (95% CI) <sup>a</sup> | No. of Participants | Rates/100,000 (95% CI) <sup>a</sup> |                                |
| <b>Eastern region</b> |                     |                                     |                     |                                     |                     |                                     |                     |                                     |                                |
| Liaoning              | 3126                | 1979 (1514-2443)                    | 3045                | 2078 (1630-2527)                    | 7204                | 1140 (948-1331)                     | 6632                | 1539 (1317-1762)                    | 0.99                           |
| Hebei                 | 6464                | 1700 (1349-2052)                    | 6252                | 2010 (1687-2333)                    | 5949                | 1231 (994-1468)                     | 5251                | 2140 (1841-2440)                    | 0.03                           |
| Tianjin               | 3402                | 1387 (1039-1736)                    | 3351                | 1925 (1539-2312)                    | 4591                | 1527 (1240-1814)                    | 3782                | 1820 (1497-2143)                    | < 0.001                        |
| Beijing               | 2995                | 1186 (850-1522)                     | 3062                | 1548 (1194-1902)                    | 2823                | 919 (664-1174)                      | 2731                | 2697 (2254-3139)                    | < 0.001                        |
| Hainan                | 3719                | 1048 (755-1340)                     | 3593                | 1132 (828-1436)                     | 3534                | 519 (312-726)                       | 3052                | 1039 (754-1325)                     | 0.99                           |
| Shandong              | 6411                | 1027 (800-1253)                     | 5885                | 1108 (884-1331)                     | 11304               | 1380 (1204-1556)                    | 11520               | 1460 (1289-1631)                    | < 0.001                        |
| Shanghai              | 2879                | 929 (660-1197)                      | 2657                | 1032 (769-1296)                     | 4305                | 819 (642-996)                       | 4225                | 1471 (1210-1732)                    | < 0.001                        |
| Guangdong             | 6914                | 563 (404-721)                       | 6713                | 395 (266-524)                       | 12642               | 569 (455-683)                       | 11204               | 750 (621-878)                       | < 0.001                        |
| Fujian                | 4880                | 417 (235-600)                       | 4781                | 433 (263-603)                       | 7560                | 390 (278-502)                       | 6716                | 593 (455-731)                       | < 0.001                        |
| Jiangsu               | 6560                | 397 (256-537)                       | 6173                | 669 (489-849)                       | 9288                | 985 (820-1149)                      | 9758                | 1537 (1347-1727)                    | < 0.001                        |
| Zhejiang              | 5042                | 394 (236-551)                       | 4896                | 477 (316-638)                       | 8904                | 765 (623-906)                       | 8817                | 781 (631-931)                       | < 0.001                        |
| <b>Central region</b> |                     |                                     |                     |                                     |                     |                                     |                     |                                     |                                |
| Heilongjiang          | 4893                | 2709 (2235-3182)                    | 4465                | 3395 (2891-3899)                    | 6697                | 3344 (2974-3714)                    | 5950                | 5061 (4648-5474)                    | < 0.001                        |
| Jilin                 | 4432                | 1962 (1559-2365)                    | 4335                | 2016 (1636-2396)                    | 5275                | 1890 (1606-2174)                    | 5113                | 3545 (3153-3937)                    | < 0.001                        |
| Henan                 | 6674                | 1703 (1394-2012)                    | 6145                | 2509 (2151-2867)                    | 13824               | 1386 (1219-1552)                    | 11925               | 2190 (1983-2397)                    | 0.15                           |
| Shanxi                | 4711                | 1016 (711-1322)                     | 4513                | 1897 (1527-2267)                    | 5335                | 1516 (1232-1800)                    | 5542                | 2874 (2531-3217)                    | < 0.001                        |
| Anhui                 | 6313                | 737 (529-945)                       | 5871                | 1020 (781-1260)                     | 11882               | 570 (458-683)                       | 10554               | 1475 (1307-1643)                    | < 0.001                        |
| Hunan                 | 5877                | 619 (433-805)                       | 5892                | 534 (377-690)                       | 11596               | 1236 (1076-1397)                    | 10483               | 1539 (1358-1720)                    | < 0.001                        |
| Hubei                 | 5882                | 461 (296-626)                       | 5668                | 887 (669-1106)                      | 11438               | 895 (758-1031)                      | 10207               | 1294 (11231465)                     | < 0.001                        |
| Jiangxi               | 4370                | 253 (102-405)                       | 4337                | 449 (270-629)                       | 8806                | 799 (645-954)                       | 7916                | 1133 (952-1314)                     | < 0.001                        |
| <b>Western region</b> |                     |                                     |                     |                                     |                     |                                     |                     |                                     |                                |
| Inner Mongolia        | 4657                | 1813 (1400-2226)                    | 4608                | 1677 (1312-2041)                    | 4155                | 3190 (2731-3650)                    | 3777                | 3193 (2749-3637)                    | < 0.001                        |
| Ningxia               | 6720                | 900 (647-1153)                      | 4968                | 1480 (1157-1803)                    | 4790                | 1536 (1232-1841)                    | 4147                | 1843 (1507-2179)                    | < 0.001                        |
| Shaanxi               | 4791                | 677 (441-914)                       | 4446                | 798 (564-1032)                      | 7582                | 1506 (1275-1738)                    | 6576                | 2261 (2000-2522)                    | < 0.001                        |
| Guizhou               | 4932                | 624 (397-851)                       | 4443                | 1044 (765-1323)                     | 6124                | 589 (420-758)                       | 5684                | 1513 (1245-1781)                    | < 0.001                        |
| Sichuan               | 3982                | 575 (381-770)                       | 4052                | 1177 (903-1451)                     | 9028                | 1361 (1173-1549)                    | 8549                | 1831 (1614-2048)                    | < 0.001                        |
| Chongqing             | 4378                | 570 (377-763)                       | 4143                | 694 (490-898)                       | 6971                | 1094 (900-1288)                     | 6841                | 1258 (1050-1467)                    | < 0.001                        |
| Xinjiang              | 5232                | 544 (306-782)                       | 5021                | 597 (385-809)                       | 7419                | 826 (629-1023)                      | 6400                | 515 (367-663)                       | 0.16                           |
| Yunnan                | 5237                | 444 (274-613)                       | 4969                | 350 (201-499)                       | 7631                | 675 (508-842)                       | 7736                | 1369 (1166-1573)                    | < 0.001                        |
| Qinghai               | 4034                | 440 (181-699)                       | 3800                | 285 (87-482)                        | 3279                | 354 (153-556)                       | 3183                | 789 (499-1078)                      | < 0.001                        |
| Gansu                 | 5692                | 326 (171-482)                       | 5366                | 389 (227-550)                       | 8030                | 721 (558-885)                       | 7211                | 1081 (893-1269)                     | < 0.001                        |
| Tibet                 | 3809                | 212 (43-381)                        | 3848                | 309 (115-503)                       | 3203                | NA                                  | 2747                | 29 (0-86)                           | NA                             |
| Guangxi               | 5069                | 212 (94-331)                        | 4933                | 394 (236-552)                       | 8897                | 586 (455-718)                       | 8089                | 871 (718-1024)                      | < 0.001                        |

Abbreviation: NA, not applicable,

## Appendix 6. Risk Factors for Stroke in Urban Areas of China from 2003 to 2018.

|                       | 2003                     |         | 2008                 |         | 2013                |         | 2018                 |         | Meta-analysis <sup>b</sup> |         |
|-----------------------|--------------------------|---------|----------------------|---------|---------------------|---------|----------------------|---------|----------------------------|---------|
|                       | OR (95% CI) <sup>a</sup> | P value | OR (95% CI)          | P value | OR (95% CI)         | P value | OR (95% CI)          | P value | OR (95% CI)                | P value |
| <b>Age</b>            |                          |         |                      |         |                     |         |                      |         |                            |         |
| < 30 y                | 1 [Reference]            |         | 1 [Reference]        |         | 1 [Reference]       |         | 1 [Reference]        |         | 1 [Reference]              |         |
| 30-39 y               | 2.18 (0.45-10.58)        | 0.33    | 1.32 (0.23-7.46)     | 0.75    | 1.77 (0.73-4.28)    | 0.20    | 1.91 (0.53-6.87)     | 0.33    | 1.76 (0.39, 3.13)          | 0.99    |
| 40-49 y               | 8.09 (1.85-35.40)        | 0.005   | 8.79 (2.02-38.28)    | 0.004   | 6.05 (2.79-13.12)   | <.001   | 14.91 (4.70-47.36)   | <.001   | 6.81 (2.16, 11.46)         | 0.87    |
| 50-59 y               | 25.82 (5.98-111.47)      | <.001   | 18.34 (4.27-78.76)   | <.001   | 15.20 (7.10-32.53)  | <.001   | 39.25-12.45-123.73   | <.001   | 17.03 (5.55, 28.50)        | 0.85    |
| 60-69 y               | 49.56 (11.42-215.02)     | <.001   | 40.14 (9.31-173.08)  | <.001   | 22.77 (10.61-48.87) | <.001   | 67.44 (21.36-212.93) | <.001   | 26.02 (8.03, 44.02)        | 0.77    |
| ≥70 y                 | 88.31 (20.30-384.08)     | <.001   | 50.55 (11.69-218.60) | <.001   | 33.30 (15.46-71.74) | <.001   | 97.84 (30.94-309.35) | <.001   | 37.89 (11.52, 64.26)       | 0.76    |
| <b>Sex</b>            |                          |         |                      |         |                     |         |                      |         |                            |         |
| Female                | 1 [Reference]            |         | 1 [Reference]        |         | 1 [Reference]       |         | 1 [Reference]        |         | 1 [Reference]              |         |
| Male                  | 1.58 (1.31-1.91)         | <.001   | 1.61 (1.33-1.93)     | <.001   | 1.52 (1.35-1.71)    | <.001   | 1.51 (1.37-1.68)     | <.001   | 1.53 (1.43, 1.64)          | 0.93    |
| <b>Region</b>         |                          |         |                      |         |                     |         |                      |         |                            |         |
| Western               | 1 [Reference]            |         | 1 [Reference]        |         | 1 [Reference]       |         | 1 [Reference]        |         | 1 [Reference]              |         |
| Central               | 2.16 (1.72-2.72)         | <.001   | 2.55 (2.00-3.23)     | <.001   | 1.04 (0.93-1.16)    | 0.53    | 1.30 (1.19-1.43)     | <.001   | 1.22 (1.13, 1.30)          | <.001   |
| Eastern               | 1.72 (1.38-2.15)         | <.001   | 1.96 (1.55-2.48)     | <.001   | 0.73 (0.65-0.83)    | <.001   | 0.99 (0.89-1.09)     | 0.79    | 0.89 (0.83, 0.96)          | <.001   |
| <b>Education</b>      |                          |         |                      |         |                     |         |                      |         |                            |         |
| College               | 1 [Reference]            |         | 1 [Reference]        |         | 1 [Reference]       |         | 1 [Reference]        |         | 1 [Reference]              |         |
| Senior high           | 1.02 (0.76-1.36)         | 0.90    | 1.19 (0.87-1.63)     | 0.28    | 1.23 (0.99-1.53)    | 0.06    | 1.20 (0.91-1.59)     | 0.20    | 1.21 (1.05, 1.37)          | 0.05    |
| Junior high           | 0.92 (0.69-1.22)         | 0.57    | 1.28 (0.94-1.74)     | 0.12    | 1.43 (1.17-1.76)    | 0.001   | 1.38 (1.06-1.81)     | 0.02    | 1.09 (0.92, 1.25)          | 0.05    |
| Primary               | 0.73 (0.54-0.98)         | 0.04    | 1.17 (0.85-1.62)     | 0.33    | 1.47 (1.19-1.82)    | <.001   | 1.35 (1.03-1.78)     | 0.03    | 1.06 (0.91, 1.21)          | <.001   |
| None                  | 0.80 (0.57-1.11)         | 0.18    | 1.15 (0.79-1.66)     | 0.47    | 1.39 (1.09-1.77)    | 0.008   | 1.21 (0.90-1.62)     | 0.20    | 1.16 (1.00, 1.32)          | 0.76    |
| <b>Occupation</b>     |                          |         |                      |         |                     |         |                      |         |                            |         |
| Employed              | 1 [Reference]            |         | 1 [Reference]        |         | 1 [Reference]       |         | 1 [Reference]        |         | 1 [Reference]              |         |
| Retired               | 1.95 (1.46-2.61)         | <.001   | 3.03 (2.08-4.41)     | <.001   | 1.61 (1.37-1.90)    | <.001   | 2.13 (1.85-2.46)     | <.001   | 1.88 (1.69, 2.06)          | 0.02    |
| Unemployed            | 1.56 (1.14-2.14)         | 0.05    | 3.13 (2.15-4.54)     | <.001   | 1.59 (1.36-1.87)    | <.001   | 2.00 (1.75-2.29)     | <.001   | 1.79 (1.61, 1.96)          | 0.02    |
| <b>Income</b>         |                          |         |                      |         |                     |         |                      |         |                            |         |
| High                  | 1 [Reference]            |         | 1 [Reference]        |         | 1 [Reference]       |         | 1 [Reference]        |         | 1 [Reference]              |         |
| Medium                | 1.01 (0.83-1.22)         | 0.93    | 1.04 (0.86-1.26)     | 0.70    | 1.11 (0.98-1.24)    | 0.09    | 1.16 (1.05-1.29)     | 0.004   | 1.17 (1.08, 1.26)          | 0.008   |
| Low                   | 1.05 (0.85-1.30)         | 0.63    | 1.04 (0.84-1.28)     | 0.74    | 1.10 (0.97-1.25)    | 0.13    | 1.42 (1.26-1.60)     | <.001   | 1.11 (1.03, 1.18)          | 0.55    |
| <b>Marital status</b> |                          |         |                      |         |                     |         |                      |         |                            |         |
| Married               | 1 [Reference]            |         | 1 [Reference]        |         | 1 [Reference]       |         | 1 [Reference]        |         | 1 [Reference]              |         |
| Single                | 0.55 (0.23-1.31)         | 0.18    | 0.82 (0.43-1.56)     | 0.54    | 0.63 (0.40-0.99)    | 0.05    | 0.67 (0.44-1.01)     | 0.06    | 0.66 (0.48, 0.84)          | 0.92    |
| Divorced              | 1.05 (0.51-2.16)         | 0.89    | 0.77 (0.38-1.59)     | 0.49    | 1.50 (1.07-2.12)    | 0.02    | 1.16 (0.88-1.51)     | 0.29    | 1.16 (0.92, 1.40)          | 0.35    |
| Widowed               | 0.97 (0.77-1.20)         | 0.76    | 0.97 (0.78-1.20)     | 0.76    | 1.12 (0.98-1.28)    | 0.10    | 0.98 (0.87-1.10)     | 0.70    | 1.02 (0.94, 1.09)          | 0.46    |
| <b>Hypertension</b>   |                          |         |                      |         |                     |         |                      |         |                            |         |
| No                    | 1 [Reference]            |         | 1 [Reference]        |         | 1 [Reference]       |         | 1 [Reference]        |         | 1 [Reference]              |         |
| Yes                   | 1.23 (1.01-1.50)         | 0.04    | 2.25 (1.91-2.65)     | <.001   | 2.94 (2.66-3.26)    | <.001   | 1.39 (1.27-1.52)     | <.001   | 1.33 (1.22, 1.45)          | <.001   |
| <b>Diabetes</b>       |                          |         |                      |         |                     |         |                      |         |                            |         |

|                                             |                   |       |                   |       |                  |       |                  |       |                    |       |
|---------------------------------------------|-------------------|-------|-------------------|-------|------------------|-------|------------------|-------|--------------------|-------|
| No                                          | 1 [Reference]     |       | 1 [Reference]     |       | 1 [Reference]    |       | 1 [Reference]    |       | 1 [Reference]      |       |
| Yes                                         | 1.58 (1.17-2.12)  | 0.003 | 1.32 (1.02-1.71)  | 0.04  | 1.37 (1.20-1.56) | <.001 | 1.26 (1.10-1.46) | <.001 | 1.33 (1.22, 1.45)  | 0.61  |
| <b>Depression</b>                           |                   |       |                   |       |                  |       |                  |       |                    |       |
| No                                          | 1 [Reference]     |       | 1 [Reference]     |       | 1 [Reference]    |       | 1 [Reference]    |       | 1 [Reference]      |       |
| Moderate                                    | 2.83 (2.39-3.36)  | <.001 | 3.23 (2.64-3.97)  | <.001 | 2.76 (2.43-3.13) | <.001 | 2.60 (2.35-2.87) | <.001 | 2.73 (2.54, 2.91)  | 0.35  |
| Severe                                      | 9.59 (6.68-13.78) | <.001 | 7.28 (4.49-11.83) | <.001 | 4.98 (3.57-6.93) | <.001 | 3.48 (2.72-4.45) | <.001 | 4.18 (3.45, 4.92)  | 0.002 |
| <b>Cigarette smoking</b>                    |                   |       |                   |       |                  |       |                  |       |                    |       |
| Never                                       | 1 [Reference]     |       | 1 [Reference]     |       | 1 [Reference]    |       | 1 [Reference]    |       | 1 [Reference]      |       |
| Smoker                                      | 0.95 (0.78-1.16)  | 0.62  | 0.89 (0.72-1.09)  | 0.25  | 1.08 (0.95-1.22) | 0.22  | 1.12 (1.01-1.25) | 0.04  | 1.05 (0.97, 1.12)  | 0.143 |
| <b>Alcohol consumption (times per week)</b> |                   |       |                   |       |                  |       |                  |       |                    |       |
| Never                                       | 1 [Reference]     |       | 1 [Reference]     |       | 1 [Reference]    |       | 1 [Reference]    |       | 1 [Reference]      |       |
| <3                                          | 0.67 (0.49-0.90)  | 0.008 | 0.69 (0.39-1.21)  | 0.19  | 0.71 (0.59-0.85) | <.001 | 0.61 (0.54-0.68) | <.001 | 0.64 (0.58, 0.70)  | 0.58  |
| ≥3                                          | 0.56 (0.40-0.80)  | 0.001 | 0.53 (0.36-0.77)  | 0.001 | 0.40 (0.32-0.50) | <.001 | 1.15 (0.99-1.34) | 0.07  | 0.55 (0.48, 0.62)  | <.001 |
| <b>Physical activity (times per week)</b>   |                   |       |                   |       |                  |       |                  |       |                    |       |
| Never                                       | 1 [Reference]     |       | 1 [Reference]     |       | 1 [Reference]    |       | 1 [Reference]    |       | 1 [Reference]      |       |
| <1                                          | 1.88 (0.96-3.68)  | 0.07  | 0.64 (0.37-1.11)  | 0.11  | 0.72 (0.49-1.06) | 0.09  | 0.86 (0.79-0.95) | 0.002 | 0.84 (0.77, 0.92)  | 0.2   |
| 1-2                                         | 0.49 (0.23-1.06)  | 0.07  | 0.61 (0.43-0.86)  | 0.005 | 0.89 (0.73-1.09) | 0.27  | 0.82 (0.70-0.95) | 0.01  | 0.79 (0.69, 0.88)  | 0.11  |
| 3-5                                         | 0.83 (0.62-1.12)  | 0.23  | 0.78 (0.60-1.02)  | 0.07  | 0.81 (0.68-0.97) | 0.03  | 0.81 (0.68-0.96) | 0.01  | 0.81 (-0.72, 0.89) | 0.99  |
| ≥6                                          | 0.99 (0.83-1.19)  | 0.93  | 0.76 (0.63-0.92)  | 0.005 | 1.06 (0.95-1.19) | 0.31  | 0.90 (0.64-1.27) | 0.55  | 0.95 (0.87, 1.03)  | 0.02  |
| <b>Sanitation facilities</b>                |                   |       |                   |       |                  |       |                  |       |                    |       |
| Improved                                    | 1 [Reference]     |       | 1 [Reference]     |       | 1 [Reference]    |       | 1 [Reference]    |       | 1 [Reference]      |       |
| Unimproved                                  | 1.15 (0.91-1.44)  | 0.24  | 1.46 (1.14-1.87)  | 0.003 | 1.20 (1.03-1.40) | 0.02  | 1.26 (1.12-1.41) | <.001 | 1.24 (1.14, 1.34)  | 0.56  |

Abbreviation: OR, odds ratio; CI, confidence interval.

<sup>a</sup> Multiple logistic regression models included age, sex, residence, region, educational level, occupation, income, marital status, hypertension, diabetes, depression, smoking, alcohol consumption, physical activity, and sanitation facilities.

<sup>b</sup> The meta estimates of serial surveys.



## Appendix 7. Risk Factors for Stroke in Rural Areas of China from 2003 to 2018..

|                       | 2003                     |         | 2008                 |         | 2013                |         | 2018                  |         | Meta-analysis <sup>b</sup> |         |
|-----------------------|--------------------------|---------|----------------------|---------|---------------------|---------|-----------------------|---------|----------------------------|---------|
|                       | OR (95% CI) <sup>a</sup> | P value | OR (95% CI)          | P value | OR (95% CI)         | P value | OR (95% CI)           | P value | OR (95% CI)                | P value |
| <b>Age</b>            |                          |         |                      |         |                     |         |                       |         |                            |         |
| < 30 y                | 1 [Reference]            |         | 1 [Reference]        |         | 1 [Reference]       |         | 1 [Reference]         |         | 1 [Reference]              |         |
| 30-39 y               | 1.92 (0.90-4.12)         | 0.09    | 3.95 (1.63-9.57)     | 0.002   | 3.47 (1.45-8.34)    | 0.005   | 3.80 (1.31-11.02)     | 0.01    | 2.51 (1.20, 3.83)          | 0.66    |
| 40-49 y               | 6.56 (3.23-13.29)        | <.001   | 12.07 (5.25-27.75)   | <.001   | 12.23 (5.51-27.15)  | <.001   | 20.83 (7.78-55.77)    | <.001   | 8.58 (4.42, 12.75)         | 0.49    |
| 50-59 y               | 13.63 (6.78-27.40)       | <.001   | 33.95 (14.92-77.27)  | <.001   | 25.19 (11.42-55.58) | <.001   | 52.16 (19.60-138.81)  | <.001   | 17.97 (9.12, 26.82)        | 0.34    |
| 60-69 y               | 22.74 (11.23-46.04)      | <.001   | 50.98 (22.32-116.46) | <.001   | 36.70 (16.60-81.12) | <.001   | 105.02 (39.45-279.54) | <.001   | 29.40 (14.94, 43.86)       | 0.38    |
| ≥70 y                 | 25.33 (12.33-52.03)      | <.001   | 50.59 (21.92-116.75) | <.001   | 43.48 (19.57-96.60) | <.001   | 123.38 (46.26-329.06) | <.001   | 32.99 (16.56, 49.41)       | 0.40    |
| <b>Sex</b>            |                          |         |                      |         |                     |         |                       |         |                            |         |
| Female                | 1 [Reference]            |         | 1 [Reference]        |         | 1 [Reference]       |         | 1 [Reference]         |         | 1 [Reference]              |         |
| Male                  | 1.65 (1.36-2.00)         | <.001   | 1.40 (1.21-1.62)     | <.001   | 1.31 (1.15-1.48)    | <.001   | 1.27 (1.15-1.40)      | <.001   | 1.33 (1.25, 1.42)          | 0.16    |
| <b>Region</b>         |                          |         |                      |         |                     |         |                       |         |                            |         |
| Western               | 1 [Reference]            |         | 1 [Reference]        |         | 1 [Reference]       |         | 1 [Reference]         |         | 1 [Reference]              |         |
| Central               | 1.69 (1.40-2.05)         | <.001   | 1.97 (1.70-2.28)     | <.001   | 1.33 (1.18-1.50)    | <.001   | 1.48 (1.35-1.62)      | <.001   | 1.50 (1.40, 1.59)          | 0.001   |
| Eastern               | 1.25 (1.03-1.51)         | 0.02    | 1.37 (1.17-1.60)     | <.001   | 1.07 (0.94-1.21)    | 0.32    | 0.87 (0.78-0.96)      | 0.007   | 1.17 (1.12, 1.23)          | <.001   |
| <b>Education</b>      |                          |         |                      |         |                     |         |                       |         |                            |         |
| College               | 1 [Reference]            |         | 1 [Reference]        |         | 1 [Reference]       |         | 1 [Reference]         |         | 1 [Reference]              |         |
| Senior high           | 0.61 (0.21-1.81)         | 0.38    | 6.32 (0.86-46.21)    | 0.07    | 1.35 (0.73-2.51)    | 0.33    | 1.25 (0.57-2.70)      | 0.58    | 1.09 (0.52, 1.66)          | 0.29    |
| Junior high           | 0.62 (0.22-1.76)         | 0.37    | 6.16 (0.85-44.58)    | 0.07    | 1.93 (1.06-3.50)    | 0.03    | 1.40 (0.65-3.01)      | 0.39    | 1.12 (0.57, 1.67)          | 0.63    |
| Primary               | 0.79 (0.28-2.23)         | 0.66    | 6.45 (0.89-46.65)    | 0.07    | 1.66 (0.92-3.02)    | 0.10    | 1.44 (0.67-3.09)      | 0.35    | 1.26 (0.65, 1.88)          | 0.63    |
| None                  | 0.70 (0.25-1.99)         | 0.50    | 5.56 (0.77-40.38)    | 0.09    | 1.47 (0.80-2.69)    | 0.21    | 1.30 (0.60-2.81)      | 0.50    | 1.02 (0.50, 1.54)          | 0.59    |
| <b>Occupation</b>     |                          |         |                      |         |                     |         |                       |         |                            |         |
| Employed              | 1 [Reference]            |         | 1 [Reference]        |         | 1 [Reference]       |         | 1 [Reference]         |         | 1 [Reference]              |         |
| Retired               | 2.05 (1.43-2.95)         | <.001   | 1.90 (1.46-2.47)     | <.001   | 1.66 (1.37-2.02)    | <.001   | 1.49 (1.28-1.73)      | <.001   | 1.61 (1.44, 1.78)          | 0.29    |
| Unemployed            | 2.35 (1.89-2.92)         | <.001   | 1.66 (1.43-1.92)     | <.001   | 1.78 (1.59-2.00)    | <.001   | 1.49 (1.37-1.63)      | <.001   | 1.61 (1.53, 1.70)          | 0.003   |
| <b>Income</b>         |                          |         |                      |         |                     |         |                       |         |                            |         |
| High                  | 1 [Reference]            |         | 1 [Reference]        |         | 1 [Reference]       |         | 1 [Reference]         |         | 1 [Reference]              |         |
| Medium                | 1.10 (0.91-1.33)         | 0.32    | 0.89 (0.77-1.04)     | 0.14    | 1.07 (0.94-1.21)    | 0.32    | 1.20 (1.07-1.34)      | 0.002   | 1.08 (1.01, 1.16)          | 0.06    |
| Low                   | 0.98 (0.80-1.20)         | 0.88    | 0.98 (0.84-1.14)     | 0.78    | 1.07 (0.95-1.21)    | 0.28    | 1.23 (1.10-1.37)      | <.001   | 1.06 (0.99, 1.13)          | 0.02    |
| <b>Marital status</b> |                          |         |                      |         |                     |         |                       |         |                            |         |
| Married               | 1 [Reference]            |         | 1 [Reference]        |         | 1 [Reference]       |         | 1 [Reference]         |         | 1 [Reference]              |         |
| Single                | 0.61 (0.33-1.11)         | 0.10    | 0.78 (0.52-1.17)     | 0.23    | 0.73 (0.50-1.06)    | 0.10    | 1.49 (1.28-1.73)      | <.001   | 1.03 (0.89, 1.18)          | <.001   |
| Divorced              | 0.70 (0.25-1.93)         | 0.49    | 0.90 (0.46-1.77)     | 0.77    | 0.59 (0.29-1.21)    | 0.15    | 2.33 (1.90-2.85)      | <.001   | 1.26 (0.98, 1.53)          | <.001   |
| Widowed               | 0.58 (0.46-0.73)         | <.001   | 0.84 (0.71-1.00)     | 0.05    | 0.75 (0.65-0.86)    | <.001   | 0.87 (0.19-4.10)      | 0.86    | 0.72 (0.65, 0.80)          | 0.07    |
| <b>Hypertension</b>   |                          |         |                      |         |                     |         |                       |         |                            |         |
| No                    | 1 [Reference]            |         | 1 [Reference]        |         | 1 [Reference]       |         | 1 [Reference]         |         | 1 [Reference]              |         |
| Yes                   | 1.67 (1.31-2.13)         | <.001   | 2.01 (1.74-2.33)     | <.001   | 3.79 (3.43-4.19)    | <.001   | 1.63 (1.49-1.77)      | <.001   | 1.89 (1.77, 2.01)          | <.001   |
| <b>Diabetes</b>       |                          |         |                      |         |                     |         |                       |         |                            |         |

|                                             |                    |       |                    |       |                  |       |                  |       |                   |       |
|---------------------------------------------|--------------------|-------|--------------------|-------|------------------|-------|------------------|-------|-------------------|-------|
| No                                          | 1 [Reference]      |       | 1 [Reference]      |       | 1 [Reference]    |       | 1 [Reference]    |       | 1 [Reference]     |       |
| Yes                                         | 1.51 (0.81-2.82)   | 0.19  | 1.10 (0.74-1.64)   | 0.64  | 1.54 (1.29-1.84) | <.001 | 1.24 (1.04-1.48) | 0.02  | 1.33 (1.17, 1.49) | 0.26  |
| <b>Depression</b>                           |                    |       |                    |       |                  |       |                  |       |                   |       |
| No                                          | 1 [Reference]      |       | 1 [Reference]      |       | 1 [Reference]    |       | 1 [Reference]    |       | 1 [Reference]     |       |
| Moderate                                    | 3.93 (3.33-4.62)   | <.001 | 4.36 (3.80-4.99)   | <.001 | 2.67 (2.37-3.01) | <.001 | 2.29 (2.11-2.50) | <.001 | 2.62 (2.46, 2.77) | <.001 |
| Severe                                      | 11.78 (8.69-15.97) | <.001 | 11.13 (8.52-14.53) | <.001 | 5.43 (4.04-7.30) | <.001 | 2.63 (2.02-3.41) | <.001 | 3.65 (3.03, 4.27) | <.001 |
| <b>Cigarette smoking</b>                    |                    |       |                    |       |                  |       |                  |       |                   |       |
| Never                                       | 1 [Reference]      |       | 1 [Reference]      |       | 1 [Reference]    |       | 1 [Reference]    |       | 1 [Reference]     |       |
| Smoker                                      | 0.83 (0.68-1.01)   | 0.06  | 0.94 (0.81-1.09)   | 0.43  | 1.14 (1.00-1.29) | 0.04  | 1.00 (0.91-1.11) | 0.95  | 0.99 (0.92, 1.05) | 0.04  |
| <b>Alcohol consumption (times per week)</b> |                    |       |                    |       |                  |       |                  |       |                   |       |
| Never                                       | 1 [Reference]      |       | 1 [Reference]      |       | 1 [Reference]    |       | 1 [Reference]    |       | 1 [Reference]     |       |
| <3                                          | 0.40 (0.29-0.56)   | <.001 | 0.35 (0.21-0.58)   | <.001 | 0.50 (0.41-0.62) | <.001 | 0.54 (0.48-0.60) | <.001 | 0.50 (0.46, 0.55) | 0.10  |
| ≥3                                          | 0.40 (0.28-0.57)   | <.001 | 0.40 (0.31-0.53)   | <.001 | 0.42 (0.34-0.51) | <.001 | 1.04 (0.90-1.20) | 0.57  | 0.50 (0.44, 0.56) | <.001 |
| <b>Physical activity (times per week)</b>   |                    |       |                    |       |                  |       |                  |       |                   |       |
| Never                                       | 1 [Reference]      |       | 1 [Reference]      |       | 1 [Reference]    |       | 1 [Reference]    |       | 1 [Reference]     |       |
| <1                                          | 0.48 (0.07-3.49)   | 0.47  | 2.27 (1.33-3.87)   | 0.003 | 1.67 (1.06-2.62) | 0.03  | 1.47 (1.35-1.60) | <.001 | 1.48 (1.36, 1.60) | 0.38  |
| 1-2                                         | 1.93 (0.70-5.34)   | 0.21  | 1.89 (1.35-2.63)   | <.001 | 1.23 (0.95-1.61) | 0.12  | 1.34 (1.17-1.54) | <.001 | 1.35 (1.20, 1.51) | 0.32  |
| 3-5                                         | 0.96 (0.49-1.90)   | 0.91  | 1.22 (0.83-1.81)   | 0.31  | 1.36 (1.09-1.70) | 0.006 | 1.14 (0.98-1.34) | 0.09  | 1.19 (1.04, 1.33) | 0.59  |
| ≥6                                          | 2.36 (1.72-3.23)   | <.001 | 1.73 (1.36-2.21)   | <.001 | 1.74 (1.49-2.04) | <.001 | 1.11 (0.80-1.55) | 0.51  | 1.62 (1.43, 1.81) | 0.008 |
| <b>Sanitation facilities</b>                |                    |       |                    |       |                  |       |                  |       |                   |       |
| Improved                                    | 1 [Reference]      |       | 1 [Reference]      |       | 1 [Reference]    |       | 1 [Reference]    |       | 1 [Reference]     |       |
| Unimproved                                  | 1.48 (1.20-1.83)   | <.001 | 1.20 (1.04-1.40)   | 0.02  | 1.49 (1.34-1.66) | <.001 | 1.37 (1.27-1.48) | <.001 | 1.37 (1.30, 1.45) | 0.11  |

Abbreviation: OR, odds ratio; CI, confidence interval.

<sup>a</sup> Multiple logistic regression models included age, sex, residence, region, educational level, occupation, income, marital status, hypertension, diabetes, depression, smoking, alcohol consumption, physical activity, and sanitation facilities.

<sup>b</sup> The meta estimates of serial surveys.
